# Supplementary material
Source: Springer Nature journal article supplement (https://www.springermedizin.de/resource/supplementary/13012_2011_405_MOESM1_ESM.pdf/9629960)
Supplement: MOESM1 [file 9629960]

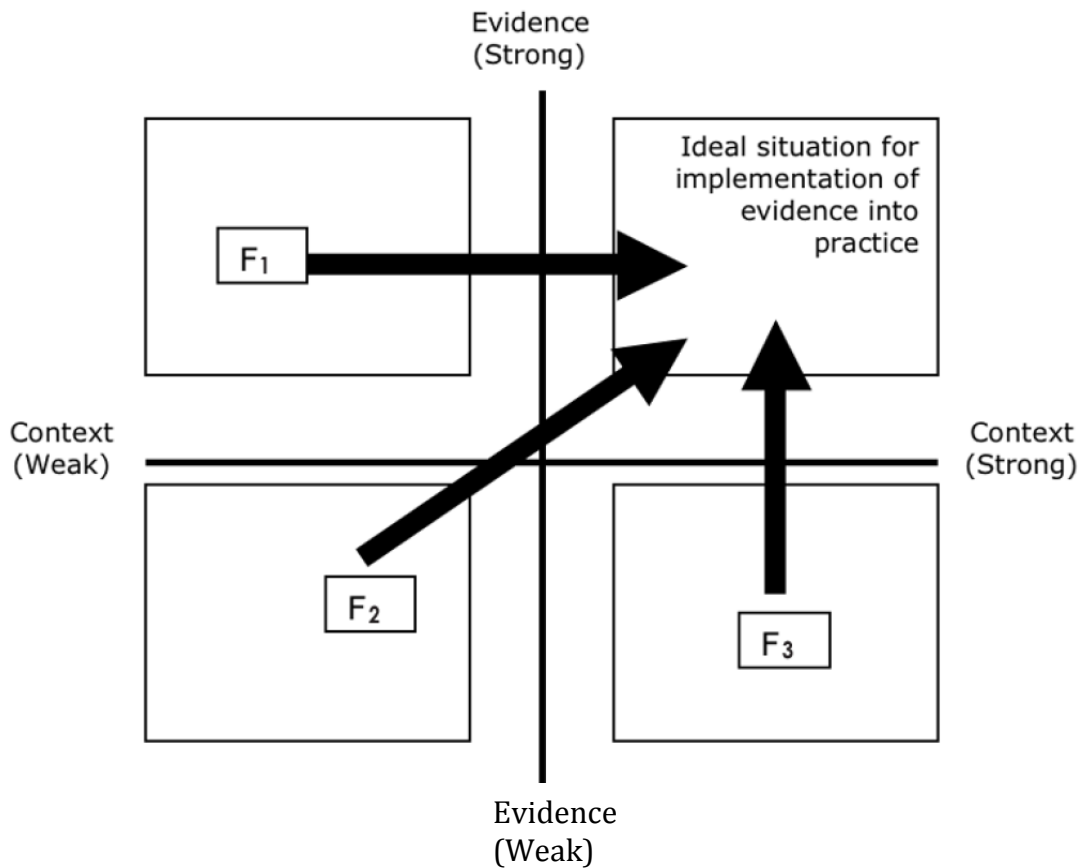

F1 = facilitation approach to be adopted in situation of strong evidence, weak context  
 F2 = facilitation approach to be adopted in situation of weak evidence, weak context  
 F3 = facilitation approach to be adopted in situation of weak evidence, strong context
